# Supplementary material
Source: PubMed Central journal article supplement (PMC1803720)
Supplement: plntphys_pp.106.091025_1.pdf [file plntphys_pp.106.091025_1.pdf]

**Supplemental Table I. Pairs of primers used for SSCP assays and DNA sequencing**

| <b>Forward primer (5' to 3')</b> | <b>Reverse primer (5' to 3')</b> | <b>Genomic DNA amplified</b> |
|----------------------------------|----------------------------------|------------------------------|
| TCT CCT AAA TGG CTG GAC A        | GAG TGA CCT TTC GTG ATG G        | - 896 nt to +1069 nt         |
| TTT ATA ATT GTT TCT TTG AAG G    | CTA ATG CAG CAC CCTCTA           | Exon 2 to Exon 3             |
| TTT GCT AGG TAA TCA GTT TC       | CCC CTT ACA AAA AGT ATA CT       | Exon 4 to Exon 5             |
| TGT GAG TAC ATC TGA CTT GT       | CCA TTA CTG ACT TAC AGA AA       | Exon 6                       |
| TGA AAT ATG TCT GTG GTC AT       | AAT TGG CAT TCT ATC GAC TT       | Exon 7 to Exon 8             |
| ATT GAA TCT CCT AAG TCG AT       | CCC ATA AAA GCA ACA TAA TAC      | Exon 9 to Exon 11            |
| TGC TTT TAT GGG TCT TAC AG       | CTT AGA GGG AAA ATG TAT CT       | Exon 12                      |
| TTT CCC TTT TGA GCA ATC AT       | AAC AAC AAA ATG AGA TAG GTT      | Exon 13                      |
| CAA GTG TAC TTA TAT TGG CT       | GAT TGG TGT GCA TAA TCC A        | Exon 14 to Exon 15           |
| GAC AGG TTT ATC TCT GTT TG       | CGA CTA ACA ACA ATT TTT GC       | Exon 16 to Exon 17           |
| GCT AAT TCA GCC ATT TCT TG       | TTT CGC AGC AGC TCG ATT          | Exon 18                      |
